# Supplementary material for: Overexpression of GRB2 Enhances Epithelial to Mesenchymal Transition of A549 Cells by Upregulating SNAIL Expression
Source: MDPI journal article supplement (doi:10.3390/cells7080097), 2018-08-07
Supplement: s1 [file s1]

**Fig S1**

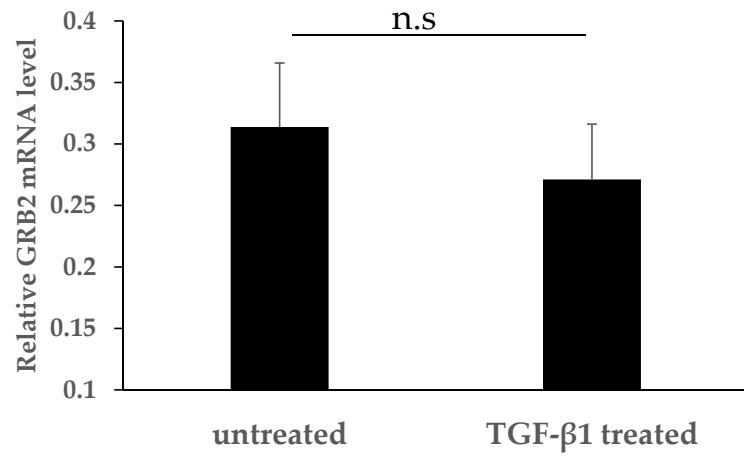

**Fig 1.** TGF-β1 treatment did not enhance transcription of GRB2 mRNA. Total RNA was isolated from untreated and TGF-β1 treated (5 ng/ml) A549 cells, converted to cDNA and RT-PCR was carried out using human GRB2 specific primers and human MRPL27 (control).

Fig S2

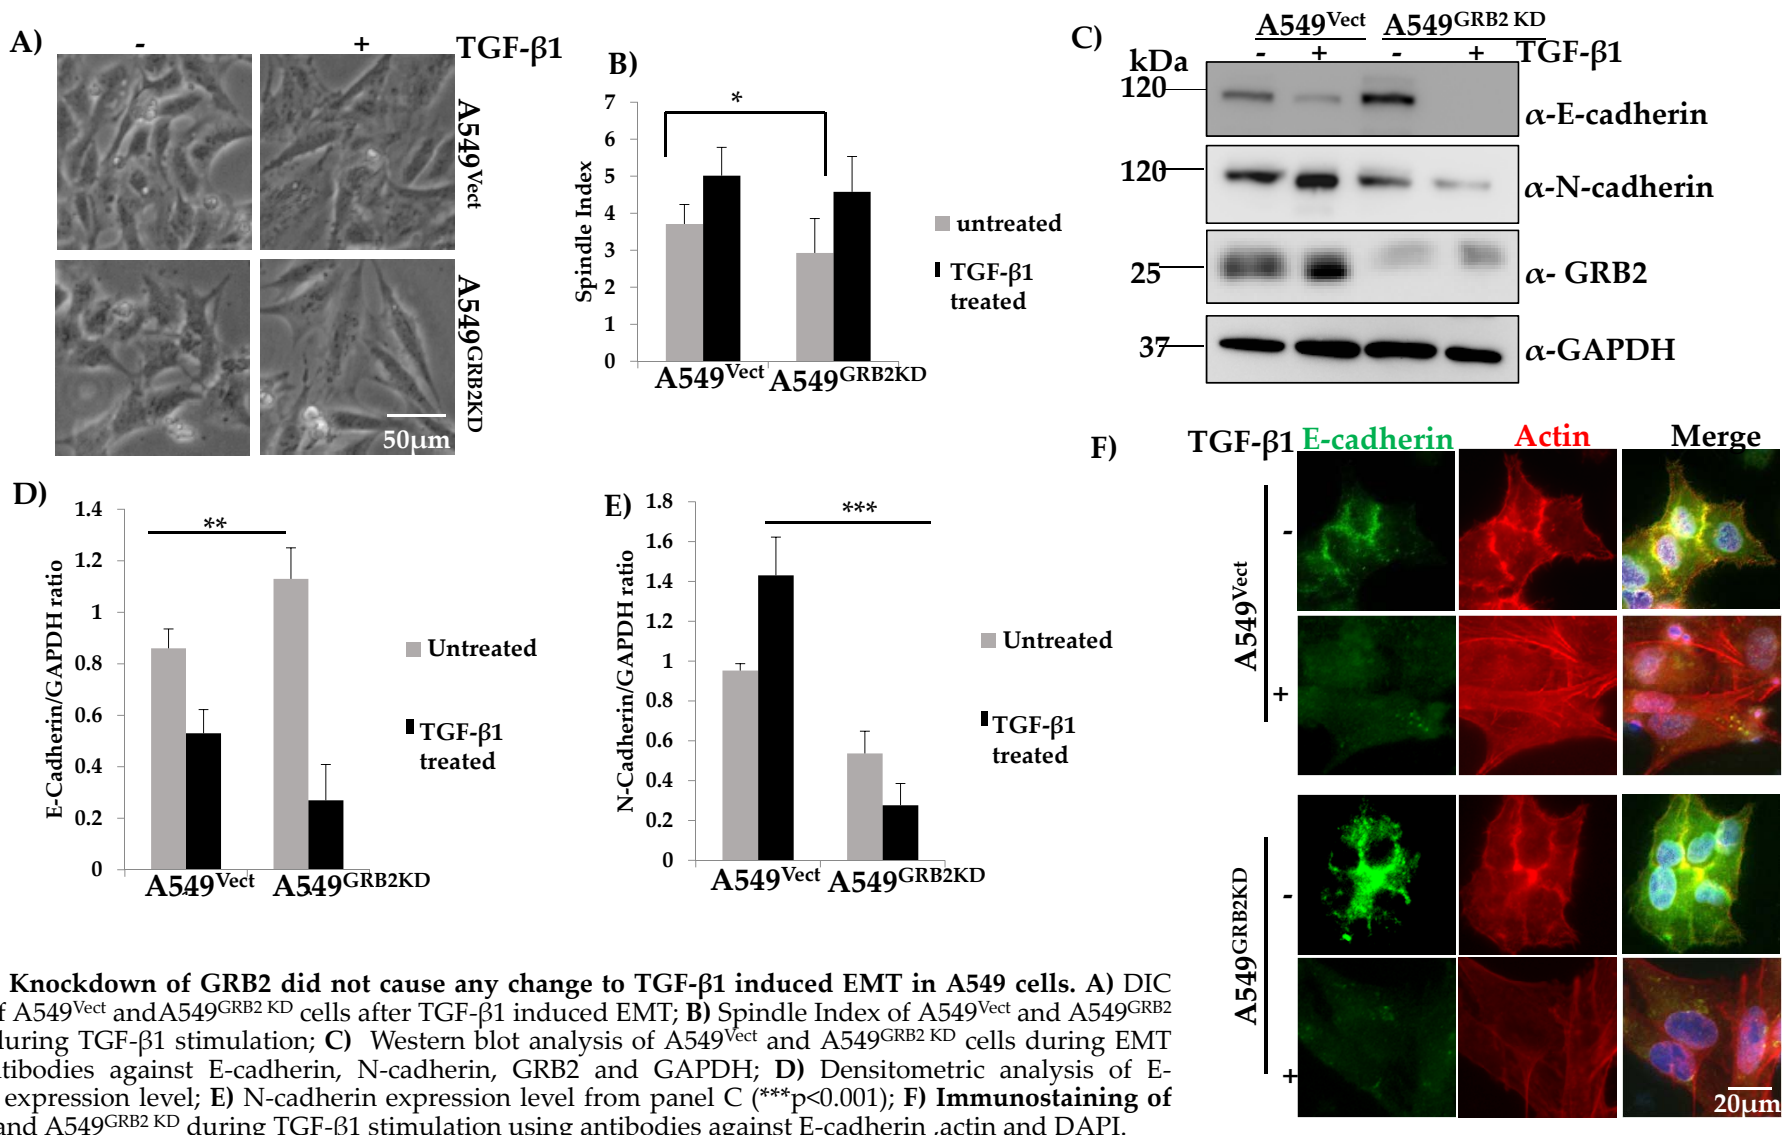

**Figure 2. Knockdown of GRB2 did not cause any change to TGF-β1 induced EMT in A549 cells.** A) DIC images of A549<sup>Vect</sup> and A549<sup>GRB2KD</sup> cells after TGF-β1 induced EMT; B) Spindle Index of A549<sup>Vect</sup> and A549<sup>GRB2KD</sup> cells during TGF-β1 stimulation; C) Western blot analysis of A549<sup>Vect</sup> and A549<sup>GRB2KD</sup> cells during EMT using antibodies against E-cadherin, N-cadherin, GRB2 and GAPDH; D) Densitometric analysis of E-cadherin expression level; E) N-cadherin expression level from panel C (\*\*p<0.001); F) Immunostaining of A549<sup>Vect</sup> and A549<sup>GRB2KD</sup> during TGF-β1 stimulation using antibodies against E-cadherin, actin and DAPI.

Fig S3

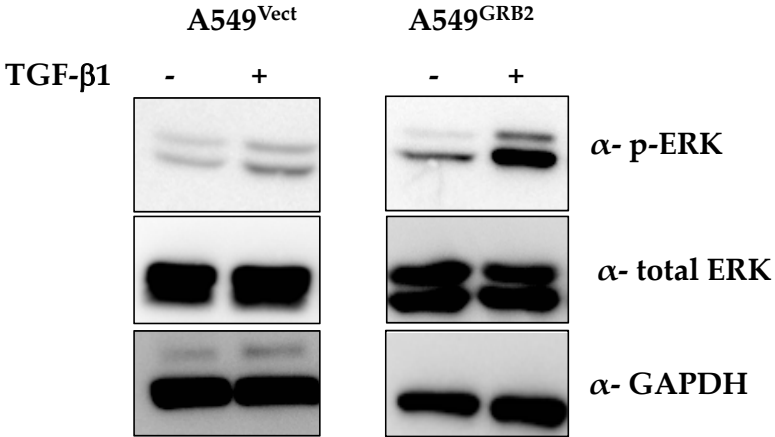

**Fig 43 GRB2 overexpression causes activation of ERK, on TGF- $\beta$  stimulation, in A549 cells.** A549<sup>Vect</sup> and A549<sup>GRB2</sup> cells were seeded and then serum starved for 12 hrs. After that, vehicle (DMSO), and TGF- $\beta$ 1+ vehicle, were added to the cells accordingly. After 2 days, cells were lysed and used for Western blot analysis to probe for pERK and total ERK.
